# Supplementary material for: Blood flow reprograms lymphatic vessels to blood vessels
Source: JCI journal article supplement (doi:10.1172/jci57513), 2012-05-24
Supplement: sd1 [file 1]

## Supplemental Methods

PCR Primer sequences:

| <b>Gene</b>  | <b>Forward Primer</b>    | <b>Reverse Primer</b>    |
|--------------|--------------------------|--------------------------|
| <i>GAPDH</i> | GAAGGTGAAGGTCGGAGTC      | GAAGATGGTGATGGGATTTC     |
| <i>PECAM</i> | AACTCAGACGTGCAGTACACGGAA | TTAAGAACCGGCAGCTTAGCCTGA |
| <i>PROX1</i> | ATAAAGTCCGAGTGCGGCGATCTT | TGACGTGCGTACTTCTCCATCTGA |
| <i>HEY1</i>  | TTTGTCTGAGCTGAGAAGGCTGGT | TCAGATAACGCGCAACTTCTGCCA |
| <i>HEY2</i>  | TAAAGGCTACTTTGACGCACACGC | TTCTGAAGTTGTGGAGAGGCGACA |
| <i>EFNB2</i> | TGTGCCAGACAAGAGCCATGAAGA | GCATCCTGAAGCAATCCCTGCAAA |

## Supplemental Figures and Legends

### Supplemental Figure 1

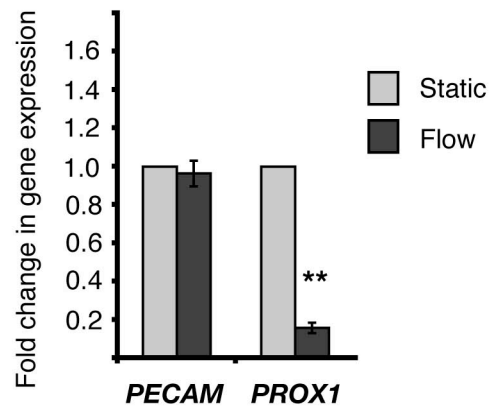

**Supplemental Figure 1. *PROX1* expression is down-regulated in LECs exposed to steady flow.** LECs were subjected to a shear stress of 20 dynes/cm<sup>2</sup> using steady flow for 8 hours and the expression of the indicated mRNAs measured using qPCR. N=3. \*\* p<0.05.

## Supplemental Figure 2

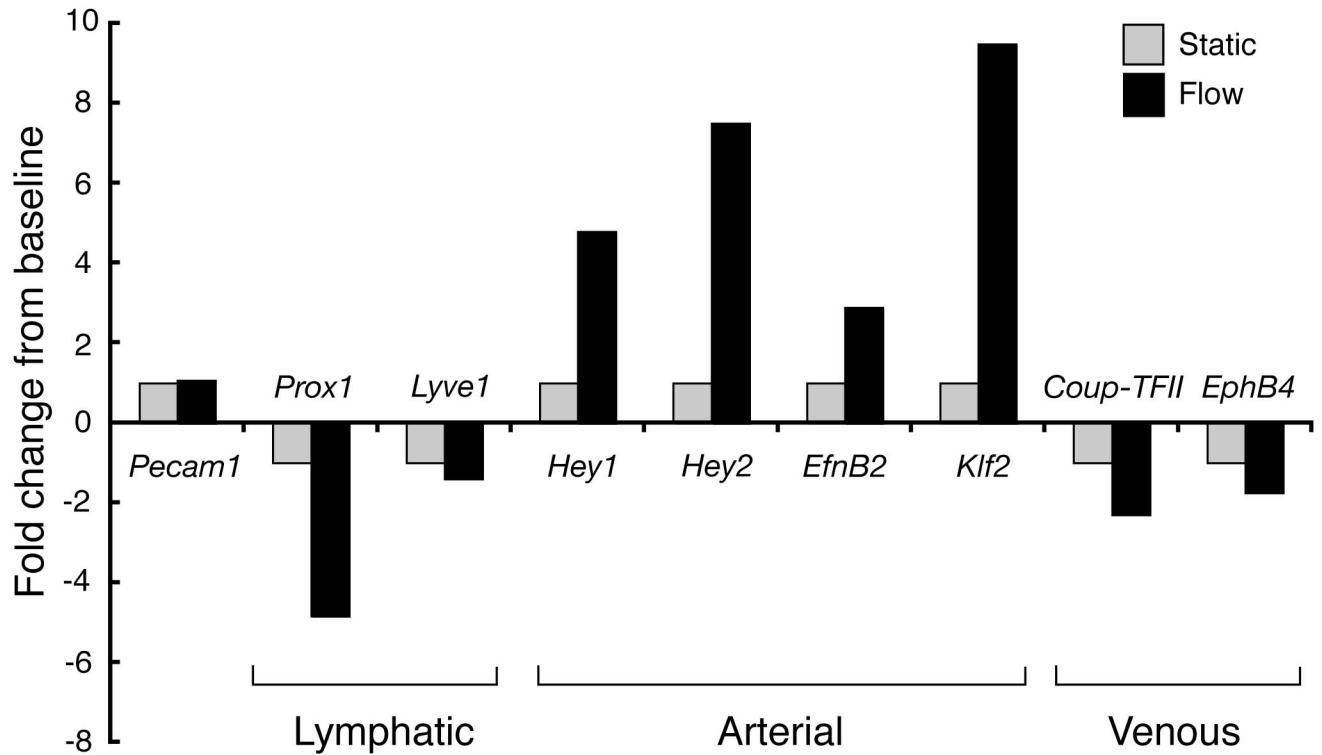

**Supplemental Figure 2. Up-regulation of arterial genes and *KLF2* in lymphatic endothelial cells exposed to flow.** LECs were subjected to a shear stress of 20 dynes/cm<sup>2</sup> using steady flow for 8 hours and the expression of the indicated mRNAs measured using qPCR. The result shown is representative of 3 individual experiments.

**Supplemental Movies 1 and 2. First-pass angiography reveals minimal flow in the blood-filled lymphatics of SLP-76-deficient radiation chimeras.** Real-time video microscopy of the intestinal vasculature was performed on lethally irradiated wild-type mice reconstituted with either wild-type (Supp. Movie 1) or SLP-76-deficient (Supp. Movie 2) bone marrow following injection of FITC-dextran into the jugular vein. In wild-type reconstituted animals sequential arterial and venous filling are observed (Supp. Movie 1 and (10)). In animals reconstituted with SLP-76-deficient bone first pass angiography also reveals sequential, rapid filling of the mesenteric artery and vein but only a minimal amount of FITC-dextran passes into the blood-filled mesenteric lymphatic (Supp. Movie 2), indicating a very low level of blood flow. In contrast, in the SLP-76-deficient animal arterial FITC-dextran does not wash out prior to simultaneous rapid filling of the mesenteric vein and lymphatic (compare to Supp. Movies S3 and S4 in (10)).

**Supplementary Table 1. Hemodynamic measurements in mesenteric vessels of *Slp-76<sup>+/+</sup>* and *Slp-76<sup>-/-</sup>* animals.**

|      | <b>Artery</b>                     |                  |                                                 | <b>Vein/Shunt Vessel</b>          |                  |                                                 | <b>Shunt Vessel</b>               |                  |                                                 |
|------|-----------------------------------|------------------|-------------------------------------------------|-----------------------------------|------------------|-------------------------------------------------|-----------------------------------|------------------|-------------------------------------------------|
|      | <b>V<sub>MEAN</sub></b><br>(mm/s) | <b>D</b><br>(mm) | <b>Shear stress</b><br>(dynes/cm <sup>2</sup> ) | <b>V<sub>MEAN</sub></b><br>(mm/s) | <b>D</b><br>(mm) | <b>Shear stress</b><br>(dynes/cm <sup>2</sup> ) | <b>V<sub>MEAN</sub></b><br>(mm/s) | <b>D</b><br>(mm) | <b>Shear stress</b><br>(dynes/cm <sup>2</sup> ) |
| WT 1 | 55.3                              | 0.15             | 103.2                                           | 20.4                              | 0.26             | 22.0                                            |                                   |                  |                                                 |
| WT 2 | 107.7                             | 0.16             | 188.4                                           | 31.7                              | 0.34             | 26.1                                            |                                   |                  |                                                 |
| WT 3 | 35.5                              | 0.10             | 99.4                                            | 10.6                              | 0.17             | 17.5                                            |                                   |                  |                                                 |
| WT 4 | 40.0                              | 0.09             | 124.4                                           | 23.2                              | 0.19             | 34.2                                            |                                   |                  |                                                 |
| WT 5 | 37.8                              | 0.11             | 96.3                                            | 13.8                              | 0.14             | 27.7                                            |                                   |                  |                                                 |
| WT 6 | 10.3                              | 0.04             | 71.8                                            | 6.6                               | 0.06             | 30.9                                            |                                   |                  |                                                 |
| KO 1 | 34.6                              | 0.07             | 138.2                                           | 10.8                              | 0.08             | 37.9                                            | 9.8                               | 0.12             | 22.9                                            |
| KO 2 | 17.6                              | 0.06             | 81.9                                            | 13.5                              | 0.13             | 29.1                                            | 19                                | 0.13             | 40.9                                            |
| KO 3 | 67.7                              | 0.07             | 270.8                                           | 5.6                               | 0.18             | 8.7                                             | 5.5                               | 0.14             | 11                                              |
| KO 4 | 10.2                              | 0.08             | 35.6                                            | 6.7                               | 0.19             | 9.8                                             | 5.5                               | 0.16             | 9.6                                             |
| KO 5 | 42.7                              | 0.07             | 171.0                                           | 17.6                              | 0.17             | 28.9                                            | 0                                 | 0.19             | 0                                               |
| KO 6 | 24.6                              |                  |                                                 | 12.9                              | 0.10             | 36.0                                            | 10.3                              | 0.10             | 28.8                                            |
| KO 7 | 16.2                              | 0.06             | 75.7                                            | 8.8                               | 0.14             | 17.6                                            | 8.8                               | 0.13             | 18.9                                            |
| KO 8 | 82.4                              | 0.18             | 128.2                                           | 7.6                               | 0.22             | 9.7                                             | 7.6                               | 0.20             | 10.7                                            |
| KO 9 | 89.2                              | 0.16             | 156.2                                           | 21.2                              | 0.21             | 28.3                                            | 10.4                              | 0.15             | 19.5                                            |
